# Supplementary material
Source: PubMed Central journal article supplement (PMC3093458)
Supplement: 1103154108_pnas.201103154SI.pdf [file 1103154108_pnas.201103154SI.pdf]

# Supporting Information

Orlovsky et al. 10.1073/pnas.1103154108

## SI Materials and Methods

**Preparation of shRNA Viruses.** The human leukemic pro-B-cell line RS4;11 was purchased from DKFZ. For shRNA knockdown experiments, the PLL 3.7 lentilox vector was obtained from L. Van Parijs, and contains a CMV-GFP expression cassette. shRNAs to silence MEIS1, HOXA7, HOXA9, and HOXA10 genes were designed using a Hannon algorithm (<http://katahdin.cshl.org/siRNA/RNAi.cgi?type=shRNA>).

Lentiviral supernatants were obtained from 293T cells cotransfected with the shRNA plasmid, together with packaging plasmids. Lentiviral infection of the RS4;11 leukemic cell line was done at multiplicity of infection of 5–10 transducing units/cell (titers of the stocks, concentrated by ultracentrifugation, were  $\sim 1 \times 10^8$  transducing units/mL). GFP-positive cells were sorted using FACS Vantage cell sorter (BD Biosciences).

**Antibodies.** Abs included polyclonal anti-HOXA9 Ab (Millipore, 07–178), polyclonal anti-HOXA7 Ab (Millipore, 09–086), polyclonal anti-HOXA10 Ab<sup>22</sup>, guinea pig anti-MEIS1 Ab<sup>22</sup>, polyclonal rabbit anti-MEIS1 Ab, and polyclonal histone H3 Ab (Millipore, 06–755). Anti-human SDF-1/CXCL12 antibodies for immunohistochemistry were purchased from R & D (MAB350). CXCR4 expression on cells' surface was examined with anti-human CXCR4-PE clone12G5 (R & D, FAB170P). Integrin  $\alpha$ -4 (Vla-4) and integrin  $\alpha$ -5 (Vla-5) expression was examined with anti-human VLA4-PE (23933) and VLA5-PE (13547) Santa Cruz antibodies, respectively. Anti-CD44 and anti-SCF R/C-kit Abs were purchased from R & D (BBA10 and AF332, respectively).

**siRNA Nucleofection and nCounter Analysis.** Pools of MEIS1, HOXA7, HOXA10, or scramble siRNAs (ON-TARGET plus SMART pools from Dharmacon) were nucleofected (Amaxa Instrument) into RS4;11 and SEM cultured cells in portions of 5 micrograms per 5 million cells (total, 25 million cells). Two days later, the nucleofection was repeated, and after 48 h the cells were subjected to RNA extraction with trizole. RNA aliquots of 100 ng biological replicates were analyzed for expression of MEIS1, HOXA, and other genes by hybridization to color-coded oligonucleotides specific to each of the above-mentioned gene transcripts. Synthesis of the oligonucleotides was done by NanoString Technologies, and hybridization and analysis was done using the Prep Station and Digital Analyzer purchased from the company.

**Engraftment Experiments.** All mouse experiments were approved by the Animal Care and Use Committee of the Weizmann Institute of Science according to National Institutes of Health guidelines. NOD/SCID mice were bred and maintained under defined flora conditions at the Weizmann Institute of Science. RS4;11 cells infected with viruses expressing shRNAs were injected i.v. ( $1 \times 10^7$  cells per mouse) 24 h after sublethal irradiation. One day (16 h) and 1–5 wk later, single cell suspensions were prepared from the BM of the transplanted mice, and engraftment was assayed by flow cytometry acquiring  $1 \times 10^6$  cells using human-specific anti-CD45-APC (Dako, C7230) mAbs. Cells obtained from mice that did not undergo transplantation, or cells labeled with mouse isotype control antibodies, were used as negative controls.

**Flow Cytometry.** Cell surface expression of CD45 was assessed by flow cytometry using mouse anti-human CD45 monoclonal antibody (mAb)-APC (Dako). Human plasma and mouse IgG were used to block Fc receptors. All CD45-positive human cells were also positive for GFP encoded by lentiviral vector which harbored the shRNA cassette. BrdU labeling was analyzed with PE mouse anti-human BrdU set (BD Biosciences, 556029). Cells stained with the secondary Ab alone or with IgG2a-PE (BD Biosciences) served as controls.

**Analysis of Cell Proliferation, Cell Cycle, and Apoptosis.** Identical numbers of cells ( $5 \times 10^6$ ) were taken from growing cultures, transferred into flasks, and grown in the absence or presence of 200 ng/mL SDF-1- $\alpha$ ; the total number of cells in the culture was determined every 3–4 d, and cultures were split 1:3 every 3 d. Cell cycle analysis was performed by flow cytometry analysis of propidium iodide-stained cells, or by BrdU incorporation analysis. Cultured cells were exposed to 10  $\mu$ M BrdU for 4 h. For in vivo analysis, BrdU (BrdU flow kit, BD Biosciences), 2 mg per mouse, was injected i.v. 3 wk after transplantation, and the BM was recovered 12 h later. BrdU incorporation was assayed by flow cytometry analysis. Apoptosis was assayed by flow cytometry analysis after Annexin V-PE (BD Biosciences) staining.

**Cell Migration Assay.** RS4;11 cells ( $2 \times 10^5$  cells/well) were allowed to migrate toward a gradient of SDF-1. Briefly, 125 ng/mL SDF-1 (PeproTech) was added to the lower chamber of a Costar 24-well 5  $\mu$ M pore transwell (Corning Incorporated Life Sciences). Four hours later, the percentage of migrated cells was evaluated by FACS.

**Immunohistochemistry of BM Sections.** Immunohistochemical staining was performed on formalin-fixed, paraffin-embedded mouse BM sections. Samples were deparaffinized and dehydrated. Endogenous peroxidase activity was quenched in 3% H<sub>2</sub>O<sub>2</sub> in double-distilled water for 20 min. Staining was performed following a standard indirect avidin-biotin HRP method using the LSAB2-HRP detection kit (DAKO) according to the manufacturer's instructions. Tissue was blocked for 30 min with 1% BSA, washed with Tris-buffered saline, and incubated overnight at 4 °C with 7–10  $\mu$ g/mL CD45 Ab (Dako LCA 2B11+PD7/26) followed by biotinylated secondary Ab (Dako LASB kit K0673). Control slides were incubated with biotinylated secondary Ab only. Slides were counterstained with Mayer hematoxylin (DAKO). For CXCL12/SDF-1 expression, serial frozen sections were prepared from bone marrow, sections were fixed by acetone, and evaluation was performed using anti-human CXCL12/SDF-1 antibodies purchased from R&D (MAB350).

**Adhesion Assay.** Twenty-four-well plates were covered with 50  $\mu$ g/mL fibronectin (FC010, Chemicon International), 1  $\mu$ g/mL V-1 (ADP5, R & D) or 150  $\mu$ g/mL hyaluronan (Sigma) ON at 4 °C. The cells were seeded at concentration of  $4 \times 10^5$  cells/well. An hour later the cells were detached from the plates and counted by FACS.

**Statistical Analysis.** Data were analyzed statistically by ANOVA. Single factor or *P* value was calculated using the two-tailed Student *t* test in Excel (Microsoft). SE bars are indicated in Figs. S3, S5, and S6.





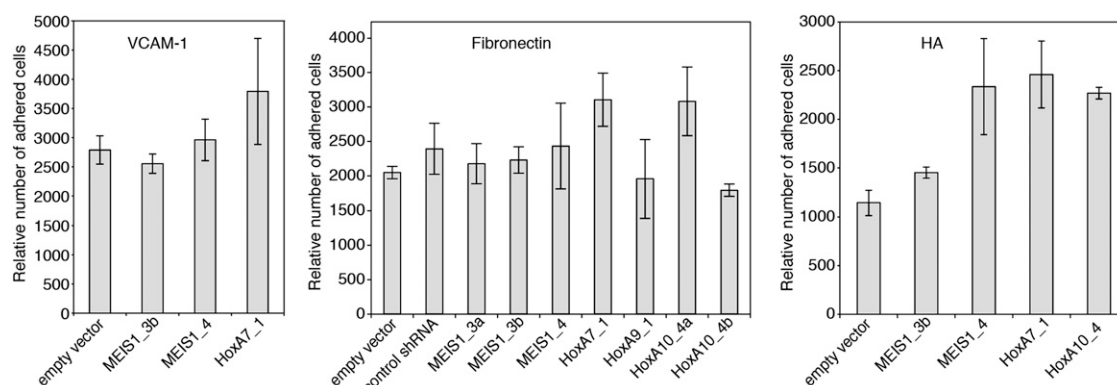

**Fig. S6.** Comparison between adhesion of mutant and control cells to fibronectin (FN), hyaluronan (HA) and VCAM1. Details of adhesion assay are given in *S1 Materials and Methods*. Each experiment was repeated eight times.

**Table S1. shRNA constructs**

| Gene          | Accession no. | shRNA construct | Nucleotides and sequence              |
|---------------|---------------|-----------------|---------------------------------------|
| <i>MEIS1</i>  | U85707        | MEIS1_3         | GGCGTGCTGTCCAGCATCTA (n. 929–950)     |
|               |               | MEIS1_4         | GAGTCATTCAATGAAGATATAG (n. 408–429)   |
| <i>HOXA7</i>  | AF032095      | HOXA7_1         | ACCGCCGCATGAAGTGGAGAA (n. 2094–2115)  |
| <i>HOXA9</i>  | U82759        | HOXA9_1         | AGCCGGCCTTATGGCATTAAAC (n. 407–428)   |
|               |               | HOXA9_3         | TTCTCTCCAGTTGATAGAGAA (n. 508–529)    |
| <i>HOXA10</i> | AF040714      | HOXA10_3        | CCGGGAGCTCACAGCCAACTTT (n. 2642–2663) |
|               |               | HOXA10_4        | AGCCAACCTGGCTACGGCAAAG (n. 2423–2444) |

n, nucleotides.

**Table S2. Impaired engraftment of RS4;11 cells knocked down for *HOXA* or *MEIS1* genes**

|                      | 1 d  | 2 wk | 3 wk  | 4 wk  | 5 wk   |
|----------------------|------|------|-------|-------|--------|
| Empty vector control | 0.10 | 1.16 | 24.26 | 45.01 | 50.00* |
| Control shRNA        | NM   | 1.06 | 23.09 | 40.22 | 55.00* |
| MEIS1_3a             | NM   | 0.17 | 8.3   | NM    | 23     |
| MEIS1_3b             | 0.10 | 0.11 | 5.17  | NM    | 23     |
| MEIS1_4              | 0.08 | 0.16 | 1.56  | NM    | NM     |
| HOXA7_1              | 0.22 | NM   | 7.57  | 6.52  | 29.00  |
| HOXA9_1              | NM   | 0.14 | 4.53  | 10.36 | NM     |
| HOXA9_3              | 0.16 | NM   | 7.96  | 3.87  | NM     |
| HOXA10_3             | 0.11 | NM   | 3.67  | 18.1  | NM     |
| HOXA10_4a            | 0.14 | 0.24 | 2.86  | 4.71  | 42.00  |
| HOXA10_4b            | 0.09 | 0.25 | 2.02  | 8.61  | NM     |

Table details engraftment as monitored by percentage of human RS4;11 cells in the bone marrow of transplanted mice. Bone marrows were isolated from the transplanted mice at different times after the transplantation, and percentage of human cells in BM was determined by FACS analysis. Numbers 1, 3, and 4 correspond to cells infected with viruses encoding shRNAs directed against different sequences of the gene. a and b correspond to different plasmid clones of the same construct. NM, not monitored.

\*More than one-half of transplanted mice died by 5 wk, and analysis is of the surviving animals. These data represent a single experiment out of five independent experiments, each performed in duplicate, and giving similar results.
